# Supplementary material for: Prevalence, prescriptions, outcomes and costs of type 2 diabetes patients with or without prior coronary artery disease or stroke: a longitudinal 5-year claims-data analysis of over 7 million inhabitants
Source: PubMed Central journal article supplement — Ther Adv Chronic Dis. 2021 Jun 22;12:20406223211026390. doi: 10.1177/20406223211026390 (PMC8221674; doi:10.1177/20406223211026390), 2021-06-22
Supplement: sj-pdf-1-taj-10.1177_20406223211026390.pdf [file sj-pdf-1-taj-10.1177_20406223211026390.pdf]

**Prevalence, prescriptions, outcomes and costs of type 2 diabetic patients with or without prior coronary artery disease or stroke. A longitudinal 5-year claims-data analysis of over 7 million inhabitants**

Aldo Pietro Maggioni, Letizia Dondi, Felicita Andreotti, Giulia Ronconi, Silvia Calabria, Carlo Piccinni, Antonella Pedrini, Imma Esposito, Nello Martini

**Supplementary Material**

**Supplementary Table 1 – Criteria to identify patients with diabetes mellitus during the accrual period (2015). At least one criterion had to be documented within the different administrative records.**

| Administrative database | Description                                                                                                                                                                                                                                                                                                                                                                                                                                                                                                                                                                                                                                                                                                                                                                                                                                                                                                                                                                                                                                                                                                                                                                                                                                                                                                                                                                                                                                                                                                                                                                                                                                                                                                                                                                                                                                                                                                                                                                                                                                                                                                                                                                                                                                                                                                                                                                                                              |
|-------------------------|--------------------------------------------------------------------------------------------------------------------------------------------------------------------------------------------------------------------------------------------------------------------------------------------------------------------------------------------------------------------------------------------------------------------------------------------------------------------------------------------------------------------------------------------------------------------------------------------------------------------------------------------------------------------------------------------------------------------------------------------------------------------------------------------------------------------------------------------------------------------------------------------------------------------------------------------------------------------------------------------------------------------------------------------------------------------------------------------------------------------------------------------------------------------------------------------------------------------------------------------------------------------------------------------------------------------------------------------------------------------------------------------------------------------------------------------------------------------------------------------------------------------------------------------------------------------------------------------------------------------------------------------------------------------------------------------------------------------------------------------------------------------------------------------------------------------------------------------------------------------------------------------------------------------------------------------------------------------------------------------------------------------------------------------------------------------------------------------------------------------------------------------------------------------------------------------------------------------------------------------------------------------------------------------------------------------------------------------------------------------------------------------------------------------------|
| Hospitalizations        | <p>At least a <u>hospitalization</u> with one of the following main/secondary diagnoses (ICD-9-CM code):</p> <p><b>250.00</b> - Diabetes mellitus without mention of complication, type II or unspecified type, not stated as uncontrolled</p> <p><b>250.02</b> - Diabetes mellitus without mention of complication, type II or unspecified type, uncontrolled</p> <p><b>250.10</b> - Diabetes with ketoacidosis, type II or unspecified type, not stated as uncontrolled</p> <p><b>250.12</b> - Diabetes with ketoacidosis, type II or unspecified type, uncontrolled</p> <p><b>250.20</b> - Diabetes with hyperosmolarity, type II or unspecified type, not stated as uncontrolled</p> <p><b>250.22</b> - Diabetes with hyperosmolarity, type II or unspecified type, uncontrolled</p> <p><b>250.30</b> - Diabetes with other coma, type II or unspecified type, not stated as uncontrolled</p> <p><b>250.32</b> - Diabetes with other coma, type II or unspecified type, uncontrolled</p> <p><b>250.40</b> - Diabetes with renal manifestations, type II or unspecified type, not stated as uncontrolled</p> <p><b>250.42</b> - Diabetes with renal manifestations, type II or unspecified type, uncontrolled</p> <p><b>250.50</b> - Diabetes with ophthalmic manifestations, type II or unspecified type, not stated as uncontrolled</p> <p><b>250.52</b> - Diabetes with ophthalmic manifestations, type II or unspecified type, uncontrolled</p> <p><b>250.60</b> - Diabetes with neurological manifestations, type II or unspecified type, not stated as uncontrolled</p> <p><b>250.62</b> - Diabetes with neurological manifestations, type II or unspecified type, uncontrolled</p> <p><b>250.70</b> - Diabetes with peripheral circulatory disorders, type II or unspecified type, not stated as uncontrolled</p> <p><b>250.72</b> - Diabetes with peripheral circulatory disorders, type II or unspecified type, uncontrolled</p> <p><b>250.80</b> - Diabetes with other specified manifestations, type II or unspecified type, not stated as uncontrolled</p> <p><b>250.82</b> - Diabetes with other specified manifestations, type II or unspecified type, uncontrolled</p> <p><b>250.90</b> - Diabetes with unspecified complication, type II or unspecified type, not stated as uncontrolled</p> <p><b>250.92</b> - Diabetes with unspecified complication, type II or unspecified type, uncontrolled</p> |
| Disease exemption       | <p><b>013</b> - Diabetes Mellitus (only for patients aged <math>\geq 35</math> and older, receiving the exemption for the first time)</p>                                                                                                                                                                                                                                                                                                                                                                                                                                                                                                                                                                                                                                                                                                                                                                                                                                                                                                                                                                                                                                                                                                                                                                                                                                                                                                                                                                                                                                                                                                                                                                                                                                                                                                                                                                                                                                                                                                                                                                                                                                                                                                                                                                                                                                                                                |
| Pharmaceuticals         | <p>Prescription of <u>at least a specific drug</u> (ATC code):</p> <p><b>A10B</b> – Blood glucose lowering drugs, excl. insulins</p>                                                                                                                                                                                                                                                                                                                                                                                                                                                                                                                                                                                                                                                                                                                                                                                                                                                                                                                                                                                                                                                                                                                                                                                                                                                                                                                                                                                                                                                                                                                                                                                                                                                                                                                                                                                                                                                                                                                                                                                                                                                                                                                                                                                                                                                                                     |

**Supplementary Table 2. Criteria to identify patients with coronary artery disease (CAD, including revascularization procedures), stroke and percutaneous coronary intervention (PCI) during the 3-year observation (2013-2015). At least one code had to be documented within the different administrative records.**

| <b>Coronary artery diseases</b>                                                                                                                                                                                                                                                                                                                                                                                                                                                                                                                                                                                                                                                                                                                                                                                                                                                                                                                                                                                                                                                                                                                                                                                                      |
|--------------------------------------------------------------------------------------------------------------------------------------------------------------------------------------------------------------------------------------------------------------------------------------------------------------------------------------------------------------------------------------------------------------------------------------------------------------------------------------------------------------------------------------------------------------------------------------------------------------------------------------------------------------------------------------------------------------------------------------------------------------------------------------------------------------------------------------------------------------------------------------------------------------------------------------------------------------------------------------------------------------------------------------------------------------------------------------------------------------------------------------------------------------------------------------------------------------------------------------|
| <p><b>Angina pectoris</b> was identified through <u>at least one hospitalization</u> with the following main/secondary diagnosis (ICD-9-CM code):</p> <ul style="list-style-type: none"> <li>• <b>413.x</b> - Angina pectoris</li> </ul>                                                                                                                                                                                                                                                                                                                                                                                                                                                                                                                                                                                                                                                                                                                                                                                                                                                                                                                                                                                             |
| <p><b>Myocardial infarction (MI)</b>, identified through <u>at least one hospitalization</u> with one of the following main/secondary diagnoses (ICD-9-CM code):</p> <ul style="list-style-type: none"> <li>• <b>410.x</b> - Acute myocardial infarction</li> <li>• <b>412</b> - Old myocardial infarction</li> </ul>                                                                                                                                                                                                                                                                                                                                                                                                                                                                                                                                                                                                                                                                                                                                                                                                                                                                                                                |
| <p><b>Other acute and subacute forms of ischemic heart disease</b>, identified through <u>at least one hospitalization</u> with the following main/secondary diagnosis (ICD-9-CM code):</p> <ul style="list-style-type: none"> <li>• <b>411.x</b> - Other acute and subacute forms of ischemic heart disease</li> </ul>                                                                                                                                                                                                                                                                                                                                                                                                                                                                                                                                                                                                                                                                                                                                                                                                                                                                                                              |
| <p><b>Other forms of chronic ischemic heart disease</b>, identified through <u>at least one</u> of the following criteria:</p> <ul style="list-style-type: none"> <li>• <u>Hospitalization</u> with the main/secondary diagnosis <b>414.x</b> - Other forms of chronic ischemic heart disease;</li> <li>• <u>Exemption code</u> <b>002.414</b> – Diseases of the circulatory system</li> </ul>                                                                                                                                                                                                                                                                                                                                                                                                                                                                                                                                                                                                                                                                                                                                                                                                                                       |
| <p><b>Revascularization procedures</b>, identified through <u>at least one hospitalization</u> with one of the following main/secondary diagnoses (ICD-9-CM code):</p> <ul style="list-style-type: none"> <li>• <b>36.0</b> – Removal of obstruction of the coronary artery and insertion of stent</li> <li>• <b>36.10</b> - Aortocoronary bypass for heart revascularization, not otherwise specified</li> <li>• <b>36.11</b> - (Aorto)coronary bypass of one coronary artery</li> <li>• <b>36.12</b> - (Aorto)coronary bypass of two coronary arteries</li> <li>• <b>36.13</b> - (Aorto)coronary bypass of three coronary arteries</li> <li>• <b>36.14</b> - (Aorto)coronary bypass of four or more coronary arteries</li> <li>• <b>36.15</b> - Single internal mammary-coronary artery bypass</li> <li>• <b>36.16</b> - Double internal mammary-coronary artery bypass</li> <li>• <b>36.17</b>- Abdominal-coronary artery bypass</li> <li>• <b>36.2</b> - Heart revascularization by arterial implant</li> <li>• <b>36.3x</b> - Other transmyocardial revascularization</li> <li>• <b>36.9x</b> - Other operations on vessels of heart</li> <li>• <b>00.66</b> - Percutaneous transluminal coronary angioplasty [PTCA]</li> </ul> |

### Stroke

At least one hospitalization with one of the following main/secondary diagnoses (ICD-9-CM code):

- **433.x1** - Occlusion and stenosis of artery with cerebral infarction
- **434.x1** - Cerebral thrombosis/embolism/artery occlusion with cerebral infarction
- **436.x** - Acute, but ill-defined, cerebrovascular disease

### Percutaneous coronary intervention (PCI)

At least one hospitalization with one of the following main/secondary diagnoses (ICD-9-CM code):

- **36.0** – Removal of obstruction of the coronary artery and insertion of stent
- **36.3x** - Other transmural revascularization
- **36.9x** - Other operations on vessels of heart
- **00.66** - Percutaneous transluminal coronary angioplasty [PTCA]

**Supplementary Table 3. Criteria to identify patients with comorbidities during the accrual period. At least one criterion had to be satisfied within the different administrative records.**

| <b>Dyslipidaemia</b>           |                                                                                                                                                                                                                                                                                                                                                               |
|--------------------------------|---------------------------------------------------------------------------------------------------------------------------------------------------------------------------------------------------------------------------------------------------------------------------------------------------------------------------------------------------------------|
| <b>Administrative database</b> | <b>Description</b>                                                                                                                                                                                                                                                                                                                                            |
| Hospitalization                | At least a <u>hospitalization</u> with one of the following main/secondary diagnoses (ICD-9-CM code):<br><b>272.x</b> - Disorders of lipid metabolism                                                                                                                                                                                                         |
| Disease exemption              | <b>025</b> - Type IIa and IIb heterozygous familial hypercholesterolemia – Polygenic hypercholesterolemia – Familial combined hypercholesterolemia – Type III hyperlipoproteinemia                                                                                                                                                                            |
| Pharmaceutical                 | Prescription of <u>at least 3 packs</u> of specific drugs:<br><b>C10A</b> - Lipid modifying agents, plain<br><b>C10B</b> - Lipid modifying agents, combinations<br><b>and/or</b><br><u>at least a prescription</u> with the exemption code 025                                                                                                                |
| <b>Severe liver diseases</b>   |                                                                                                                                                                                                                                                                                                                                                               |
| <b>Administrative database</b> | <b>Description</b>                                                                                                                                                                                                                                                                                                                                            |
| Hospitalizations               | At least a <u>hospitalization</u> with one of the following main/secondary diagnoses (ICD-9-CM code):<br><b>070.x</b> - Viral hepatitis<br><b>571.x</b> - Chronic liver disease and cirrhosis<br><b>572.x</b> - Liver abscess and sequelae of chronic liver disease<br><b>573.x</b> - Other disorders of liver<br><b>V42.7</b> - Liver replaced by transplant |
| Exemption for disease          | <b>016</b> – Chronic hepatitis (active)<br><b>008</b> – Liver cirrhosis, biliary cirrhosis                                                                                                                                                                                                                                                                    |
| Pharmaceutical                 | At least a <u>prescription</u> of a specific drug:<br><b>J05AP</b> - Antivirals for treatment of HCV infections<br><b>and/or</b><br><u>at least a prescription</u> with the exemption code <b>016 or 008</b>                                                                                                                                                  |
| <b>Atrial fibrillation</b>     |                                                                                                                                                                                                                                                                                                                                                               |
| <b>Administrative database</b> | <b>Description</b>                                                                                                                                                                                                                                                                                                                                            |
| Hospitalizations               | <b>427.3</b> - Atrial fibrillation and flutter                                                                                                                                                                                                                                                                                                                |

| <b>Heart failure</b>           |                                                                                                                                                                                                                                                                                                                                                                                                                                                                                                                                                                                                                                                                                                                                                                                                                                                                                                                                                                                                                                                                                                                                                                                                                                                                                                                                                                                                                            |
|--------------------------------|----------------------------------------------------------------------------------------------------------------------------------------------------------------------------------------------------------------------------------------------------------------------------------------------------------------------------------------------------------------------------------------------------------------------------------------------------------------------------------------------------------------------------------------------------------------------------------------------------------------------------------------------------------------------------------------------------------------------------------------------------------------------------------------------------------------------------------------------------------------------------------------------------------------------------------------------------------------------------------------------------------------------------------------------------------------------------------------------------------------------------------------------------------------------------------------------------------------------------------------------------------------------------------------------------------------------------------------------------------------------------------------------------------------------------|
| <b>Administrative database</b> | <b>Description</b>                                                                                                                                                                                                                                                                                                                                                                                                                                                                                                                                                                                                                                                                                                                                                                                                                                                                                                                                                                                                                                                                                                                                                                                                                                                                                                                                                                                                         |
| Hospitalizations               | <p>At least a <u>hospitalization</u> with one of the following main/secondary diagnoses (ICD-9-CM code):</p> <p><b>402.01</b> – Malignant hypertensive heart disease with heart failure<br/> <b>402.11</b> – Benign hypertensive heart disease with heart failure<br/> <b>402.91</b> – Unspecified hypertensive heart disease with heart failure<br/> <b>404.01</b> – Hypertensive heart and chronic kidney disease, malignant, with heart failure and with chronic kidney disease stage I through stage IV, or unspecified<br/> <b>404.03</b> – Hypertensive heart and chronic kidney disease, malignant, with heart failure and with chronic kidney disease stage V or end stage renal disease<br/> <b>404.11</b> – Hypertensive heart and chronic kidney disease, benign, with heart failure and with chronic kidney disease stage I through stage IV, or unspecified<br/> <b>404.13</b> – Hypertensive heart and chronic kidney disease, benign, with heart failure and chronic kidney disease stage V or end stage renal disease<br/> <b>404.91</b> – Hypertensive heart and chronic kidney disease, unspecified, with heart failure and with chronic kidney disease stage I through stage IV, or unspecified<br/> <b>404.93</b> - Hypertensive heart and chronic kidney disease, unspecified, with heart failure and chronic kidney disease stage V or end stage renal disease<br/> <b>428.x</b> – Heart failure</p> |
| Disease exemption              | <b>021.428</b> - Heart failure                                                                                                                                                                                                                                                                                                                                                                                                                                                                                                                                                                                                                                                                                                                                                                                                                                                                                                                                                                                                                                                                                                                                                                                                                                                                                                                                                                                             |
| Pharmaceutical                 | At least a <u>prescription</u> with the exemption code <b>021</b>                                                                                                                                                                                                                                                                                                                                                                                                                                                                                                                                                                                                                                                                                                                                                                                                                                                                                                                                                                                                                                                                                                                                                                                                                                                                                                                                                          |
| <b>Depression</b>              |                                                                                                                                                                                                                                                                                                                                                                                                                                                                                                                                                                                                                                                                                                                                                                                                                                                                                                                                                                                                                                                                                                                                                                                                                                                                                                                                                                                                                            |
| <b>Administrative database</b> | <b>Description</b>                                                                                                                                                                                                                                                                                                                                                                                                                                                                                                                                                                                                                                                                                                                                                                                                                                                                                                                                                                                                                                                                                                                                                                                                                                                                                                                                                                                                         |
| Hospitalizations               | <p>At least a <u>hospitalization</u> with one of the following main/secondary diagnoses (ICD-9-CM code):</p> <p><b>296.2x</b> - Major depressive disorder single episode<br/> <b>296.3x</b> - Major depressive disorder recurrent episode<br/> <b>296.5x</b> - Bipolar disorder, most recent episode (or current) depressed<br/> <b>296.82</b> - Atypical depressive disorder<br/> <b>298.0x</b> - Depressive type psychosis<br/> <b>300.4</b> - Dysthymic disorder<br/> <b>301.12</b> - Chronic depressive personality disorder</p>                                                                                                                                                                                                                                                                                                                                                                                                                                                                                                                                                                                                                                                                                                                                                                                                                                                                                       |

|                                |                                                                                                                                                                                                                                                                                                                                                                                                                                                                                                                                                                                                                                                                              |
|--------------------------------|------------------------------------------------------------------------------------------------------------------------------------------------------------------------------------------------------------------------------------------------------------------------------------------------------------------------------------------------------------------------------------------------------------------------------------------------------------------------------------------------------------------------------------------------------------------------------------------------------------------------------------------------------------------------------|
| Disease exemption              | <b>044.296.2</b> - Psychosis (major depressive disorder single episode)<br><b>044.296.3</b> - Psychosis (major depressive disorder recurrent episode)<br><b>044.296.5</b> - Psychosis (bipolar disorder, most recent episode (or current) depressed)<br><b>044.296.8</b> - Psychosis (manic depressive psychosis, other unspecified)<br><b>044.298.0</b> – Psychosis (depressive type psychosis)                                                                                                                                                                                                                                                                             |
| Pharmaceutical                 | At least a prescription of a specific drug:<br><b>N06A</b> – Antidepressants                                                                                                                                                                                                                                                                                                                                                                                                                                                                                                                                                                                                 |
| <b>Arterial hypertension</b>   |                                                                                                                                                                                                                                                                                                                                                                                                                                                                                                                                                                                                                                                                              |
| <b>Administrative database</b> | <b>Description</b>                                                                                                                                                                                                                                                                                                                                                                                                                                                                                                                                                                                                                                                           |
| Hospitalizations               | <u>At least a hospitalization</u> with one of the following main/secondary diagnoses (ICD-9-CM code):<br><b>401.x</b> - Essential hypertension<br><b>402.x</b> - Hypertensive heart disease<br><b>403.x</b> - Hypertensive chronic kidney disease<br><b>404.x</b> - Hypertensive heart and chronic kidney disease<br><b>405.x</b> - Secondary hypertension                                                                                                                                                                                                                                                                                                                   |
| Disease exemption              | <b>031</b> – Arterial hypertension<br><b>A31</b> - Arterial hypertension without organ damage                                                                                                                                                                                                                                                                                                                                                                                                                                                                                                                                                                                |
| Pharmaceutical                 | Prescription of <u>at least 4 packs</u> of one or more specific drugs:<br><b>C02A</b> – Antiadrenergic agents, centrally acting<br><b>C02C</b> - Antiadrenergic agents, peripherally acting<br><b>C03</b> - Diuretics<br><b>C07</b> – Beta blocking agents<br><b>C08</b> – Calcium channel blockers<br><b>C09A</b> – ACE-inhibitors, plain<br><b>C09B</b> – ACE-inhibitors, combinations<br><b>C09C</b> - Angiotensin II receptor blockers (ARBs), plain<br><b>C09D</b> - Angiotensin II receptor blockers (ARBs), combinations<br><b>C09X</b> – Renin-inhibitors<br><p style="text-align: center;"><b>and/or</b></p> Prescription with the exemption code <b>031 or A31</b> |
| <b>Neoplasia</b>               |                                                                                                                                                                                                                                                                                                                                                                                                                                                                                                                                                                                                                                                                              |
| <b>Administrative database</b> | <b>Description</b>                                                                                                                                                                                                                                                                                                                                                                                                                                                                                                                                                                                                                                                           |
| Hospitalizations               | <u>At least a hospitalization</u> with one of the following main/secondary diagnoses (ICD-9-CM code):<br><b>140.x - 208.x</b> – Tumours<br><b>V10.x</b> - Personal history of malignant neoplasm<br><b>V58.1x</b> - Encounter for antineoplastic chemotherapy and immunotherapy<br><p style="text-align: center;"><b>and/or</b></p>                                                                                                                                                                                                                                                                                                                                          |

|                                |                                                                                                                                                                                                                                                                                                                                                                                                                                                                                                                                                                                                                                                                                                                                                                                                                                                                                                                                                                                                  |
|--------------------------------|--------------------------------------------------------------------------------------------------------------------------------------------------------------------------------------------------------------------------------------------------------------------------------------------------------------------------------------------------------------------------------------------------------------------------------------------------------------------------------------------------------------------------------------------------------------------------------------------------------------------------------------------------------------------------------------------------------------------------------------------------------------------------------------------------------------------------------------------------------------------------------------------------------------------------------------------------------------------------------------------------|
|                                | <p>At least a <u>hospitalization</u> with one of the following procedures:</p> <p><b>00.10</b> - Implantation of chemotherapeutic agent<br/> <b>00.15</b> - High-dose infusion interleukin-2 [IL-2]<br/> <b>99.25</b> - Injection or infusion of cancer chemotherapeutic substance<br/> <b>99.28</b> - Injection or infusion of biological response modifier [BRM] as an antineoplastic agent</p>                                                                                                                                                                                                                                                                                                                                                                                                                                                                                                                                                                                                |
| Outpatient specialist services | <p><b>99.25</b> - Injection or infusion of cancer chemotherapeutic substance<br/> <b>99.24.1</b> – Infusion of hormonal substances</p>                                                                                                                                                                                                                                                                                                                                                                                                                                                                                                                                                                                                                                                                                                                                                                                                                                                           |
| Disease exemption              | <b>048</b> – Neoplastic malignant diseases and neoplasm of uncertain behaviour                                                                                                                                                                                                                                                                                                                                                                                                                                                                                                                                                                                                                                                                                                                                                                                                                                                                                                                   |
| Pharmaceutical                 | <p>At least a <u>prescription</u> of a specific drug:</p> <p><b>L01</b> – Antineoplastic agents<br/> <b>and/or</b><br/> Prescription with the exemption code <b>048</b></p>                                                                                                                                                                                                                                                                                                                                                                                                                                                                                                                                                                                                                                                                                                                                                                                                                      |
| <b>Chronic kidney diseases</b> |                                                                                                                                                                                                                                                                                                                                                                                                                                                                                                                                                                                                                                                                                                                                                                                                                                                                                                                                                                                                  |
| <b>Administrative database</b> | <b>Description</b>                                                                                                                                                                                                                                                                                                                                                                                                                                                                                                                                                                                                                                                                                                                                                                                                                                                                                                                                                                               |
| Hospitalizations               | <p>At least a <u>hospitalization</u> with one of the following main/secondary diagnoses (ICD-9-CM code):</p> <p><b>582.x</b> - Chronic glomerulonephritis<br/> <b>583.x</b> - Nephritis and nephropathy not specified as acute or chronic<br/> <b>584.x</b> - Acute kidney failure<br/> <b>585.x</b> - Chronic kidney disease (CKD)<br/> <b>586</b> - Renal failure, unspecified<br/> <b>587</b> - Renal sclerosis, unspecified<br/> <b>588</b> - Disorders resulting from impaired renal function<br/> <b>V56.x</b> - Encounter for dialysis and dialysis catheter care<br/> <b>V42.0</b> - Kidney replaced by transplant<br/> <b>and/or</b></p> <p>At least a <u>hospitalization</u> with the following DRG code:<br/> <b>317</b> - Renal failure with dialysis<br/> <b>and/or</b></p> <p>At least a <u>hospitalization</u> with one of the following procedures:</p> <p><b>39.95.x</b> - Hemodialysis<br/> <b>55.6x</b> - Renal transplantation<br/> <b>54.98.x</b> - Peritoneal dialysis</p> |
| Outpatient specialist services | <p><b>39.95</b> – Hemodialysis<br/> <b>54.98</b> - Peritoneal dialysis</p>                                                                                                                                                                                                                                                                                                                                                                                                                                                                                                                                                                                                                                                                                                                                                                                                                                                                                                                       |
| Disease exemption              | <p><b>023</b> – Chronic renal failure<br/> <b>061</b> – Chronic renal diseases</p>                                                                                                                                                                                                                                                                                                                                                                                                                                                                                                                                                                                                                                                                                                                                                                                                                                                                                                               |
| Pharmaceutical                 | Prescription with the exemption code <b>023 or 061</b>                                                                                                                                                                                                                                                                                                                                                                                                                                                                                                                                                                                                                                                                                                                                                                                                                                                                                                                                           |



| <b>Chronic lung diseases</b>   |                                                                                                                                                                                                                                                                                                                                                                                                                                               |
|--------------------------------|-----------------------------------------------------------------------------------------------------------------------------------------------------------------------------------------------------------------------------------------------------------------------------------------------------------------------------------------------------------------------------------------------------------------------------------------------|
| <b>Administrative database</b> | <b>Description</b>                                                                                                                                                                                                                                                                                                                                                                                                                            |
| Hospitalizations               | <p>At least a <u>hospitalization</u> with one of the following main/secondary diagnoses (ICD-9-CM code):</p> <p><b>490.x</b> - Bronchitis, not specified as acute or chronic<br/> <b>491.x</b> - Chronic bronchitis<br/> <b>492.x</b> - Emphysema<br/> <b>493.x</b> - Asthma<br/> <b>494.x</b> - Bronchiectasis<br/> <b>496.x</b> - Chronic airway obstruction, not elsewhere classified<br/> <b>518.81- 518.84</b> - Respiratory failure</p> |
| Disease exemption              | <p><b>024</b> – Chronic respiratory failure<br/> <b>007</b> - Asthma</p>                                                                                                                                                                                                                                                                                                                                                                      |
| Pharmaceutical                 | <p>Prescription of <u>at least 3 packs</u> of drugs for obstructive airway diseases:</p> <p style="text-align: center;"><b>R03</b> – Drugs for obstructive airway diseases<br/> <b>and/or</b></p> <p>Prescription with the exemption code <b>024 or 007</b></p>                                                                                                                                                                               |

**Supplementary Table 4. Criteria to identify patients with stroke/transient ischemic attack, acute coronary syndrome or peripheral artery disease during the two-year follow-up. At least one code had to be documented within the different administrative records.**

| <b>Stroke/Transient Ischemic Attack</b>                                                                                                                                                                                                                                                                                                                                                                                                                                                                                                                                                                                                                                                                                       |
|-------------------------------------------------------------------------------------------------------------------------------------------------------------------------------------------------------------------------------------------------------------------------------------------------------------------------------------------------------------------------------------------------------------------------------------------------------------------------------------------------------------------------------------------------------------------------------------------------------------------------------------------------------------------------------------------------------------------------------|
| <p><u>At least a hospitalization</u> with one of the following main diagnoses (ICD-9-CM code):</p> <p><b>433.x</b> – Occlusion and stenosis of precerebral arteries</p> <p><b>434.x</b> - Occlusion of cerebral arteries</p> <p><b>435.x</b> - Transient cerebral ischemia</p> <p><b>436.x</b> - Acute, but ill-defined, cerebrovascular disease</p> <p><b>437.x</b> - Other and ill-defined cerebrovascular disease</p>                                                                                                                                                                                                                                                                                                      |
| <b>Acute Coronary Syndrome</b>                                                                                                                                                                                                                                                                                                                                                                                                                                                                                                                                                                                                                                                                                                |
| <p><u>At least a hospitalization</u> with one of the following main diagnoses (ICD-9-CM code):</p> <p><b>410.x</b> – Acute myocardial infarction</p> <p><b>411.x</b> - Other acute and subacute forms of ischemic heart disease</p>                                                                                                                                                                                                                                                                                                                                                                                                                                                                                           |
| <b>Peripheral Artery Disease</b>                                                                                                                                                                                                                                                                                                                                                                                                                                                                                                                                                                                                                                                                                              |
| <p><u>At least a hospitalization</u> with one of the following main diagnoses (ICD-9-CM code):</p> <p><b>250.7x</b> - Diabetes with peripheral circulatory disorders</p> <p><b>440.x</b> – Atherosclerosis</p> <p><b>441.x</b> - Aortic aneurysm and dissection</p> <p><b>442.x</b> - Other aneurysm</p> <p><b>443.x</b> - Other peripheral vascular disease</p> <p><b>444.x</b> - Arterial embolism and thrombosis</p> <p><b>447.1</b> - Stricture of artery</p> <p><b>707.1x</b> - Ulcer of lower limbs, except decubitus ulcer</p> <p><b>785.4</b> – Gangrene</p> <p><b>V49.6x</b> - Upper limb amputation status</p> <p><b>V49.7x</b> - Lower limb amputation status</p> <p style="text-align: center;"><b>AND/OR</b></p> |

Hospitalization associated to one of the following DRG codes:

**113** - Amputation due to circulatory diseases, except upper limb and toes amputations

**114** – Upper limb and toes amputation due to circulatory diseases

**AND/OR**

Hospitalization with procedures on cardiovascular or musculoskeletal system, or on blood vessels

**00.45** - Insertion of one vascular stent

**00.55** - Insertion of drug-eluting non-coronary artery stent(s)

**00.61** - Percutaneous angioplasty of extracranial vessel(s)

**00.63** - Percutaneous insertion of carotid artery stent(s)

**00.64** - Percutaneous insertion of other extracranial artery stent(s)

**38.02** - Incision of vessels, other vessels of head and neck

**38.12** - Endarterectomy, other vessels of head and neck

**38.18** - Endarterectomy, lower limb arteries

**38.32** - Resection of vessel with anastomosis, other vessels of head and neck

**38.42** - Resection of vessel with replacement, other vessels of head and neck

**38.62** - Other excision of vessels, other vessels of head and neck

**38.82** - Other surgical occlusion of vessels, other vessels of head and neck

**39.22** - Aorta-subclavian-carotid bypass

**39.25** - Aorta-iliac-femoral bypass

**39.29** - Other (peripheral) vascular shunt or bypass

**39.50** - Angioplasty of other non-coronary vessel

**39.90** - Insertion of non-drug-eluting, non-coronary artery stent(s)

**84.0x** - Amputation of upper limb

**84.1x** - Amputation of lower limb

Supplementary Figure 1. The 2015 Italian population from the Ricerca e Salute (ReS) database (DB) and from the Italian Institute of Statistics (ISTAT) by age groups.

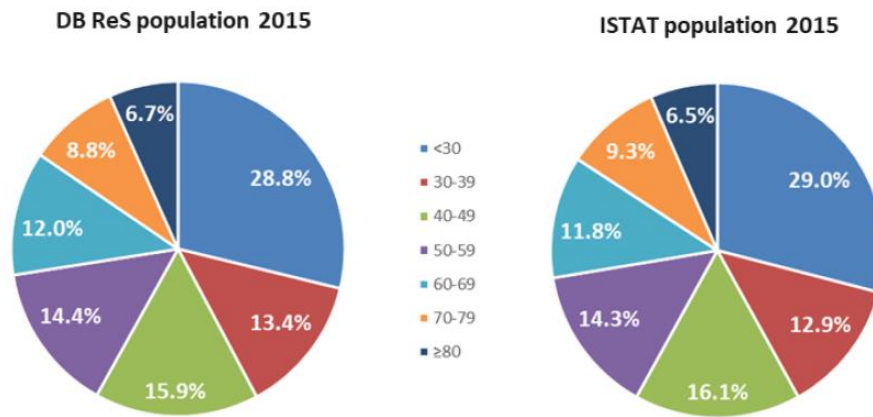

---

<sup>1</sup> <http://demo.istat.it/>
